# Supplementary material for: A sea surface temperature reconstruction for the southern Indian Ocean trade wind belt from corals in Rodrigues Island (19° S, 63° E)
Source: Copernicus journal article supplement (doi:10.5194/bg-2016-69), 2016-03-03
Supplement: Supplementary file 1 [file bg-2016-69-supplement.pdf]

## Supplementary Information

**Supplementary Tables** – Correlations between Coral records (Rodrigues coral composite, Totor, Cabri) SST anomaly reconstructions and grid-SST products (ERSSTv3b/4, HadISST, HadSST3, HadMAT1, HadNMAT2; see citations in main text). All correlations for detrended data computed at knmi climate explorer with 95% Confidence intervals (CI) computed with a Monte Carlo (van Oldenborgh and Burgers, 2005). Lag= 0, corr= correlation coefficient; p= p-value; no= number of observations.

| months  | lag | corr  | p      | no | 95% CI       |
|---------|-----|-------|--------|----|--------------|
| Jan-Dec | 0   | 0.280 | 0.0290 | 61 | 0.07... 0.48 |
| Feb-Jan | 0   | 0.271 | 0.0349 | 61 | 0.08... 0.48 |
| Mar-Feb | 0   | 0.251 | 0.0509 | 61 | 0.08... 0.45 |
| Apr-Mar | 0   | 0.266 | 0.0385 | 61 | 0.13... 0.47 |
| May-Apr | 0   | 0.279 | 0.0292 | 61 | 0.13... 0.47 |
| Jun-May | 0   | 0.282 | 0.0276 | 61 | 0.13... 0.47 |
| Jul-Jun | 0   | 0.279 | 0.0296 | 61 | 0.12... 0.45 |
| Aug-Jul | 0   | 0.274 | 0.0328 | 61 | 0.10... 0.45 |
| Sep-Aug | 0   | 0.250 | 0.0518 | 61 | 0.07... 0.45 |
| Oct-Sep | 0   | 0.234 | 0.0715 | 60 | 0.04... 0.42 |
| Nov-Oct | 0   | 0.235 | 0.0709 | 60 | 0.04... 0.42 |
| Dec-Nov | 0   | 0.259 | 0.0455 | 60 | 0.06... 0.45 |

Supplementary Table 1 - Rodrigues ERSSTv3b with Rodrigues coral composite SST (detrend) for annual averages 1945-2005.

| months  | lag | corr  | p      | no | 95% CI       |
|---------|-----|-------|--------|----|--------------|
| Jan-Dec | 0   | 0.424 | 0.0007 | 60 | 0.23... 0.58 |
| Feb-Jan | 0   | 0.401 | 0.0015 | 60 | 0.21... 0.58 |
| Mar-Feb | 0   | 0.362 | 0.0045 | 60 | 0.17... 0.55 |
| Apr-Mar | 0   | 0.354 | 0.0055 | 60 | 0.17... 0.53 |
| May-Apr | 0   | 0.366 | 0.0040 | 60 | 0.19... 0.53 |
| Jun-May | 0   | 0.369 | 0.0037 | 60 | 0.19... 0.54 |
| Jul-Jun | 0   | 0.357 | 0.0051 | 60 | 0.16... 0.52 |
| Aug-Jul | 0   | 0.365 | 0.0038 | 61 | 0.17... 0.54 |
| Sep-Aug | 0   | 0.377 | 0.0028 | 61 | 0.19... 0.54 |
| Oct-Sep | 0   | 0.382 | 0.0026 | 60 | 0.23... 0.56 |
| Nov-Oct | 0   | 0.393 | 0.0019 | 60 | 0.23... 0.56 |
| Dec-Nov | 0   | 0.426 | 0.0007 | 60 | 0.26... 0.58 |

Supplementary Table 2 - Rodrigues ERSSTv3b with Cabri SST (detrend) for annual averages 1945-2005.

| months  | lag | corr   | p      | no | 95% CI        |
|---------|-----|--------|--------|----|---------------|
| Jan-Dec | 0   | 0.032  | 0.8054 | 60 | -0.20... 0.28 |
| Feb-Jan | 0   | 0.046  | 0.7284 | 60 | -0.19... 0.30 |
| Mar-Feb | 0   | 0.058  | 0.6599 | 60 | -0.18... 0.31 |
| Apr-Mar | 0   | 0.087  | 0.5065 | 60 | -0.15... 0.33 |
| May-Apr | 0   | 0.096  | 0.4676 | 60 | -0.13... 0.33 |
| Jun-May | 0   | 0.087  | 0.5078 | 60 | -0.16... 0.31 |
| Jul-Jun | 0   | 0.090  | 0.4949 | 60 | -0.14... 0.31 |
| Aug-Jul | 0   | 0.082  | 0.5355 | 60 | -0.15... 0.29 |
| Sep-Aug | 0   | 0.046  | 0.7282 | 60 | -0.21... 0.25 |
| Oct-Sep | 0   | -0.010 | 0.9379 | 59 | -0.25... 0.23 |
| Nov-Oct | 0   | -0.007 | 0.9583 | 59 | -0.25... 0.23 |
| Dec-Nov | 0   | 0.006  | 0.9651 | 59 | -0.23... 0.25 |

Supplementary Table 3 - Rodrigues ERSSTv3b with Totor SST (detrend) for annual averages 1945-2005.

| months  | lag | corr  | p      | no | 95% CI       |
|---------|-----|-------|--------|----|--------------|
| Jan-Dec | 0   | 0.393 | 0.0017 | 61 | 0.19... 0.55 |
| Feb-Jan | 0   | 0.390 | 0.0019 | 61 | 0.22... 0.56 |
| Mar-Feb | 0   | 0.362 | 0.0041 | 61 | 0.21... 0.53 |
| Apr-Mar | 0   | 0.368 | 0.0036 | 61 | 0.23... 0.53 |
| May-Apr | 0   | 0.368 | 0.0036 | 61 | 0.22... 0.52 |
| Jun-May | 0   | 0.348 | 0.0062 | 61 | 0.20... 0.52 |
| Jul-Jun | 0   | 0.319 | 0.0130 | 61 | 0.14... 0.49 |
| Aug-Jul | 0   | 0.297 | 0.0201 | 61 | 0.11... 0.46 |
| Sep-Aug | 0   | 0.274 | 0.0328 | 61 | 0.08... 0.47 |
| Oct-Sep | 0   | 0.280 | 0.0305 | 60 | 0.08... 0.46 |
| Nov-Oct | 0   | 0.294 | 0.0224 | 60 | 0.09... 0.47 |
| Dec-Nov | 0   | 0.331 | 0.0098 | 60 | 0.13... 0.49 |

Supplementary Table 4 - Rodrigues ERSSTv4 with Rodrigues coral composite SST (detrend) for annual averages 1945-2005.

| months  | lag | corr  | p      | no | 95% CI       |
|---------|-----|-------|--------|----|--------------|
| Jan-Dec | 0   | 0.487 | 0.0001 | 60 | 0.31... 0.64 |
| Feb-Jan | 0   | 0.474 | 0.0001 | 60 | 0.29... 0.63 |
| Mar-Feb | 0   | 0.440 | 0.0004 | 60 | 0.27... 0.60 |
| Apr-Mar | 0   | 0.433 | 0.0005 | 60 | 0.26... 0.61 |
| May-Apr | 0   | 0.434 | 0.0005 | 60 | 0.24... 0.60 |
| Jun-May | 0   | 0.414 | 0.0011 | 60 | 0.22... 0.59 |
| Jul-Jun | 0   | 0.392 | 0.0022 | 60 | 0.18... 0.58 |
| Aug-Jul | 0   | 0.394 | 0.0017 | 61 | 0.19... 0.58 |
| Sep-Aug | 0   | 0.401 | 0.0014 | 61 | 0.21... 0.56 |
| Oct-Sep | 0   | 0.419 | 0.0009 | 60 | 0.28... 0.60 |
| Nov-Oct | 0   | 0.437 | 0.0005 | 60 | 0.27... 0.62 |
| Dec-Nov | 0   | 0.478 | 0.0001 | 60 | 0.32... 0.6  |

Supplementary Table 5 - Rodrigues ERSSTv4 with Cabri SST (detrend) for annual averages 1945-2005.

| months  | lag | corr  | p      | no | 95% CI        |
|---------|-----|-------|--------|----|---------------|
| Jan-Dec | 0   | 0.074 | 0.5744 | 60 | -0.14... 0.30 |
| Feb-Jan | 0   | 0.096 | 0.4673 | 60 | -0.13... 0.34 |
| Mar-Feb | 0   | 0.093 | 0.4787 | 60 | -0.14... 0.32 |
| Apr-Mar | 0   | 0.113 | 0.3900 | 60 | -0.10... 0.32 |
| May-Apr | 0   | 0.121 | 0.3575 | 60 | -0.10... 0.33 |
| Jun-May | 0   | 0.116 | 0.3761 | 60 | -0.10... 0.33 |
| Jul-Jun | 0   | 0.100 | 0.4539 | 60 | -0.12... 0.30 |
| Aug-Jul | 0   | 0.084 | 0.5251 | 60 | -0.18... 0.30 |
| Sep-Aug | 0   | 0.053 | 0.6891 | 60 | -0.22... 0.26 |
| Oct-Sep | 0   | 0.015 | 0.9106 | 59 | -0.23... 0.26 |
| Nov-Oct | 0   | 0.032 | 0.8120 | 59 | -0.21... 0.26 |
| Dec-Nov | 0   | 0.052 | 0.6961 | 59 | -0.20... 0.28 |

Supplementary Table 6 - Rodrigues ERSSTv4 with Totor SST (detrend) for annual averages 1945-2005.

| months  | lag | corr  | p      | no | 95% CI       |
|---------|-----|-------|--------|----|--------------|
| Jan-Dec | 0   | 0.400 | 0.0022 | 56 | 0.24... 0.59 |
| Feb-Jan | 0   | 0.389 | 0.0030 | 56 | 0.22... 0.57 |
| Mar-Feb | 0   | 0.370 | 0.0050 | 56 | 0.24... 0.56 |
| Apr-Mar | 0   | 0.370 | 0.0050 | 56 | 0.24... 0.55 |
| May-Apr | 0   | 0.384 | 0.0035 | 56 | 0.25... 0.59 |
| Jun-May | 0   | 0.392 | 0.0028 | 56 | 0.25... 0.60 |
| Jul-Jun | 0   | 0.395 | 0.0026 | 56 | 0.22... 0.58 |
| Aug-Jul | 0   | 0.385 | 0.0034 | 56 | 0.19... 0.57 |
| Sep-Aug | 0   | 0.351 | 0.0079 | 56 | 0.16... 0.55 |
| Oct-Sep | 0   | 0.355 | 0.0079 | 55 | 0.17... 0.56 |
| Nov-Oct | 0   | 0.379 | 0.0043 | 55 | 0.20... 0.55 |
| Dec-Nov | 0   | 0.403 | 0.0023 | 55 | 0.24... 0.58 |

Supplementary Table 7 - Rodrigues HadISST with Rodrigues coral composite SST (detrend) for annual averages 1945-2005.

| months  | lag | corr  | p      | no | 95% CI       |
|---------|-----|-------|--------|----|--------------|
| Jan-Dec | 0   | 0.536 | 0.0000 | 60 | 0.35... 0.67 |
| Feb-Jan | 0   | 0.515 | 0.0000 | 60 | 0.32... 0.65 |
| Mar-Feb | 0   | 0.482 | 0.0001 | 60 | 0.31... 0.64 |
| Apr-Mar | 0   | 0.458 | 0.0002 | 60 | 0.28... 0.63 |
| May-Apr | 0   | 0.456 | 0.0002 | 60 | 0.28... 0.62 |
| Jun-May | 0   | 0.454 | 0.0003 | 60 | 0.28... 0.61 |
| Jul-Jun | 0   | 0.458 | 0.0002 | 60 | 0.29... 0.62 |
| Aug-Jul | 0   | 0.461 | 0.0002 | 61 | 0.26... 0.62 |
| Sep-Aug | 0   | 0.457 | 0.0002 | 61 | 0.26... 0.62 |
| Oct-Sep | 0   | 0.476 | 0.0001 | 60 | 0.31... 0.64 |
| Nov-Oct | 0   | 0.513 | 0.0000 | 60 | 0.34... 0.66 |
| Dec-Nov | 0   | 0.544 | 0.0000 | 60 | 0.38... 0.69 |

Supplementary Table 8 - Rodrigues HadISST with Cabri SST (detrend) for annual averages 1945-2005.

| months  | lag | corr  | p      | no | 95% CI        |
|---------|-----|-------|--------|----|---------------|
| Jan-Dec | 0   | 0.119 | 0.3652 | 60 | -0.09... 0.33 |
| Feb-Jan | 0   | 0.120 | 0.3623 | 60 | -0.09... 0.35 |
| Mar-Feb | 0   | 0.125 | 0.3396 | 60 | -0.11... 0.36 |
| Apr-Mar | 0   | 0.145 | 0.2678 | 60 | -0.08... 0.38 |
| May-Apr | 0   | 0.159 | 0.2240 | 60 | -0.08... 0.38 |
| Jun-May | 0   | 0.157 | 0.2311 | 60 | -0.08... 0.39 |
| Jul-Jun | 0   | 0.143 | 0.2755 | 60 | -0.07... 0.37 |
| Aug-Jul | 0   | 0.124 | 0.3447 | 60 | -0.09... 0.36 |
| Sep-Aug | 0   | 0.089 | 0.4987 | 60 | -0.14... 0.33 |
| Oct-Sep | 0   | 0.086 | 0.5162 | 59 | -0.14... 0.31 |
| Nov-Oct | 0   | 0.097 | 0.4634 | 59 | -0.11... 0.33 |
| Dec-Nov | 0   | 0.100 | 0.4533 | 59 | -0.11... 0.31 |

Supplementary Table 9 - Rodrigues HadISST with Totor SST (detrend) for annual averages 1945-2005.

| months  | lag | corr  | p      | no | 95% CI       |
|---------|-----|-------|--------|----|--------------|
| Jan-Dec | 0   | 0.459 | 0.0004 | 55 | 0.23... 0.63 |
| Feb-Jan | 0   | 0.438 | 0.0008 | 55 | 0.20... 0.62 |
| Mar-Feb | 0   | 0.425 | 0.0011 | 56 | 0.21... 0.61 |
| Apr-Mar | 0   | 0.396 | 0.0026 | 56 | 0.19... 0.58 |
| May-Apr | 0   | 0.409 | 0.0018 | 56 | 0.23... 0.60 |
| Jun-May | 0   | 0.420 | 0.0013 | 56 | 0.26... 0.60 |
| Jul-Jun | 0   | 0.408 | 0.0018 | 56 | 0.23... 0.58 |
| Aug-Jul | 0   | 0.376 | 0.0043 | 56 | 0.16... 0.57 |
| Sep-Aug | 0   | 0.349 | 0.0084 | 56 | 0.14... 0.56 |
| Oct-Sep | 0   | 0.342 | 0.0107 | 55 | 0.10... 0.56 |
| Nov-Oct | 0   | 0.389 | 0.0034 | 55 | 0.14... 0.58 |
| Dec-Nov | 0   | 0.409 | 0.0019 | 55 | 0.18... 0.58 |

Supplementary Table 10 - Rodrigues HadSST3 with Rodrigues coral composite SST (detrend) for annual averages 1945-2005.

| months  | lag | corr  | p      | no | 95% CI       |
|---------|-----|-------|--------|----|--------------|
| Jan-Dec | 0   | 0.441 | 0.0008 | 55 | 0.23... 0.64 |
| Feb-Jan | 0   | 0.411 | 0.0018 | 55 | 0.19... 0.60 |
| Mar-Feb | 0   | 0.396 | 0.0025 | 56 | 0.16... 0.61 |
| Apr-Mar | 0   | 0.377 | 0.0042 | 56 | 0.13... 0.59 |
| May-Apr | 0   | 0.379 | 0.0040 | 56 | 0.16... 0.61 |
| Jun-May | 0   | 0.391 | 0.0029 | 56 | 0.17... 0.60 |
| Jul-Jun | 0   | 0.377 | 0.0042 | 56 | 0.14... 0.60 |
| Aug-Jul | 0   | 0.372 | 0.0048 | 56 | 0.11... 0.60 |
| Sep-Aug | 0   | 0.392 | 0.0028 | 56 | 0.15... 0.61 |
| Oct-Sep | 0   | 0.407 | 0.0020 | 55 | 0.19... 0.65 |
| Nov-Oct | 0   | 0.425 | 0.0012 | 55 | 0.24... 0.64 |
| Dec-Nov | 0   | 0.430 | 0.0010 | 55 | 0.25... 0.63 |

Supplementary Table 11 - Rodrigues HadSST3 with Cabri SST (detrend) for annual averages 1945-2005.

| months  | lag | corr  | p      | no | 95% CI        |
|---------|-----|-------|--------|----|---------------|
| Jan-Dec | 0   | 0.240 | 0.0800 | 54 | -0.01... 0.47 |
| Feb-Jan | 0   | 0.239 | 0.0821 | 54 | -0.01... 0.49 |
| Mar-Feb | 0   | 0.248 | 0.0683 | 55 | 0.01... 0.50  |
| Apr-Mar | 0   | 0.225 | 0.0983 | 55 | -0.04... 0.47 |
| May-Apr | 0   | 0.235 | 0.0837 | 55 | -0.03... 0.48 |
| Jun-May | 0   | 0.239 | 0.0790 | 55 | -0.01... 0.48 |
| Jul-Jun | 0   | 0.232 | 0.0882 | 55 | -0.06... 0.46 |
| Aug-Jul | 0   | 0.199 | 0.1444 | 55 | -0.10... 0.46 |
| Sep-Aug | 0   | 0.154 | 0.2631 | 55 | -0.14... 0.41 |
| Oct-Sep | 0   | 0.107 | 0.4420 | 54 | -0.20... 0.40 |
| Nov-Oct | 0   | 0.159 | 0.2523 | 54 | -0.11... 0.42 |
| Dec-Nov | 0   | 0.176 | 0.2040 | 54 | -0.09... 0.42 |

Supplementary Table 12 - Rodrigues HadSST3 with Totor SST (detrend) for annual averages 1945-2005.

| months  | lag | corr  | p      | no | 95% CI       |
|---------|-----|-------|--------|----|--------------|
| Jan-Dec | 0   | 0.514 | 0.0000 | 66 | 0.33... 0.65 |
| Feb-Jan | 0   | 0.421 | 0.0004 | 66 | 0.20... 0.60 |
| Mar-Feb | 0   | 0.474 | 0.0001 | 67 | 0.24... 0.67 |
| Apr-Mar | 0   | 0.425 | 0.0004 | 66 | 0.19... 0.61 |
| May-Apr | 0   | 0.454 | 0.0001 | 66 | 0.28... 0.63 |
| Jun-May | 0   | 0.465 | 0.0001 | 66 | 0.31... 0.61 |
| Jul-Jun | 0   | 0.440 | 0.0002 | 66 | 0.26... 0.58 |
| Aug-Jul | 0   | 0.430 | 0.0002 | 68 | 0.24... 0.59 |
| Sep-Aug | 0   | 0.386 | 0.0011 | 68 | 0.19... 0.57 |
| Oct-Sep | 0   | 0.354 | 0.0033 | 67 | 0.11... 0.56 |
| Nov-Oct | 0   | 0.392 | 0.0010 | 67 | 0.19... 0.57 |
| Dec-Nov | 0   | 0.430 | 0.0003 | 67 | 0.24... 0.57 |

Supplementary Table 13 - Rodrigues HadSST3 with Rodrigues coral composite SST (detrend) for annual averages, all years with data in HadSST3.

| months  | lag | corr  | p      | no | 95% CI        |
|---------|-----|-------|--------|----|---------------|
| Jan-Dec | 0   | 0.240 | 0.0540 | 65 | 0.04... 0.43  |
| Feb-Jan | 0   | 0.181 | 0.1496 | 65 | -0.04... 0.40 |
| Mar-Feb | 0   | 0.249 | 0.0436 | 66 | 0.01... 0.47  |
| Apr-Mar | 0   | 0.196 | 0.1186 | 65 | -0.04... 0.43 |
| May-Apr | 0   | 0.208 | 0.0968 | 65 | -0.01... 0.42 |
| Jun-May | 0   | 0.206 | 0.0993 | 65 | 0.00... 0.38  |
| Jul-Jun | 0   | 0.192 | 0.1249 | 65 | -0.01... 0.37 |
| Aug-Jul | 0   | 0.190 | 0.1244 | 67 | -0.02... 0.37 |
| Sep-Aug | 0   | 0.144 | 0.2436 | 67 | -0.10... 0.34 |
| Oct-Sep | 0   | 0.086 | 0.4941 | 66 | -0.13... 0.29 |
| Nov-Oct | 0   | 0.122 | 0.3273 | 66 | -0.07... 0.33 |
| Dec-Nov | 0   | 0.151 | 0.2259 | 66 | -0.05... 0.35 |

Supplementary Table 14 - Rodrigues HadSST3 with Totor SST (detrend) for annual averages all years with data in HadSST3.

| months  | lag | corr  | p      | no | 95% CI       |
|---------|-----|-------|--------|----|--------------|
| Jan-Dec | 0   | 0.554 | 0.0000 | 52 | 0.36... 0.71 |
| Feb-Jan | 0   | 0.532 | 0.0001 | 52 | 0.33... 0.70 |
| Mar-Feb | 0   | 0.501 | 0.0002 | 51 | 0.28... 0.68 |
| Apr-Mar | 0   | 0.490 | 0.0003 | 51 | 0.28... 0.67 |
| May-Apr | 0   | 0.486 | 0.0003 | 51 | 0.32... 0.66 |
| Jun-May | 0   | 0.482 | 0.0003 | 51 | 0.31... 0.66 |
| Jul-Jun | 0   | 0.478 | 0.0004 | 51 | 0.30... 0.65 |
| Aug-Jul | 0   | 0.458 | 0.0007 | 51 | 0.26... 0.64 |
| Sep-Aug | 0   | 0.451 | 0.0009 | 51 | 0.24... 0.64 |
| Oct-Sep | 0   | 0.481 | 0.0004 | 51 | 0.28... 0.67 |
| Nov-Oct | 0   | 0.514 | 0.0001 | 51 | 0.32... 0.68 |
| Dec-Nov | 0   | 0.542 | 0.0000 | 51 | 0.35... 0.69 |

Supplementary Table 15 - Rodrigues HadMAT1 with Rodrigues coral composite SST (detrend) for annual averages 1945-2001.

| months  | lag | corr  | p      | no | 95% CI       |
|---------|-----|-------|--------|----|--------------|
| Jan-Dec | 0   | 0.557 | 0.0000 | 56 | 0.40... 0.70 |
| Feb-Jan | 0   | 0.534 | 0.0000 | 56 | 0.37... 0.69 |
| Mar-Feb | 0   | 0.501 | 0.0001 | 55 | 0.31... 0.65 |
| Apr-Mar | 0   | 0.479 | 0.0002 | 55 | 0.31... 0.66 |
| May-Apr | 0   | 0.474 | 0.0003 | 55 | 0.29... 0.63 |
| Jun-May | 0   | 0.479 | 0.0002 | 55 | 0.32... 0.64 |
| Jul-Jun | 0   | 0.483 | 0.0002 | 55 | 0.34... 0.64 |
| Aug-Jul | 0   | 0.470 | 0.0003 | 56 | 0.30... 0.64 |
| Sep-Aug | 0   | 0.488 | 0.0001 | 56 | 0.33... 0.65 |
| Oct-Sep | 0   | 0.528 | 0.0000 | 56 | 0.39... 0.69 |
| Nov-Oct | 0   | 0.528 | 0.0000 | 56 | 0.37... 0.68 |
| Dec-Nov | 0   | 0.549 | 0.0000 | 56 | 0.40... 0.70 |

Supplementary Table 16 - Rodrigues HadMAT1 with Cabri SST (detrend) for annual averages 1945-2001.

| months  | lag | corr  | p      | no | 95% CI        |
|---------|-----|-------|--------|----|---------------|
| Jan-Dec | 0   | 0.299 | 0.0237 | 57 | 0.05... 0.52  |
| Feb-Jan | 0   | 0.290 | 0.0284 | 57 | 0.02... 0.52  |
| Mar-Feb | 0   | 0.270 | 0.0446 | 56 | 0.00... 0.55  |
| Apr-Mar | 0   | 0.255 | 0.0581 | 56 | -0.01... 0.52 |
| May-Apr | 0   | 0.246 | 0.0676 | 56 | -0.01... 0.50 |
| Jun-May | 0   | 0.248 | 0.0656 | 56 | 0.03... 0.50  |
| Jul-Jun | 0   | 0.254 | 0.0592 | 56 | 0.02... 0.51  |
| Aug-Jul | 0   | 0.224 | 0.0974 | 56 | -0.04... 0.47 |
| Sep-Aug | 0   | 0.196 | 0.1480 | 56 | -0.05... 0.44 |
| Oct-Sep | 0   | 0.203 | 0.1336 | 56 | -0.04... 0.43 |
| Nov-Oct | 0   | 0.242 | 0.0726 | 56 | -0.02... 0.48 |
| Dec-Nov | 0   | 0.254 | 0.0590 | 56 | 0.00... 0.47  |

Supplementary Table 17 - Rodrigues HadMAT1 with Totor SST (detrend) for annual averages 1945-2001.

| months  | lag | corr  | p      | no | 95% CI       |
|---------|-----|-------|--------|----|--------------|
| Jan-Dec | 0   | 0.651 | 0.0000 | 45 | 0.50... 0.77 |
| Feb-Jan | 0   | 0.626 | 0.0000 | 45 | 0.48... 0.77 |
| Mar-Feb | 0   | 0.609 | 0.0000 | 45 | 0.48... 0.74 |
| Apr-Mar | 0   | 0.586 | 0.0000 | 46 | 0.46... 0.72 |
| May-Apr | 0   | 0.611 | 0.0000 | 46 | 0.49... 0.75 |
| Jun-May | 0   | 0.635 | 0.0000 | 46 | 0.52... 0.77 |
| Jul-Jun | 0   | 0.654 | 0.0000 | 47 | 0.51... 0.77 |
| Aug-Jul | 0   | 0.650 | 0.0000 | 47 | 0.50... 0.77 |
| Sep-Aug | 0   | 0.580 | 0.0000 | 47 | 0.37... 0.76 |
| Oct-Sep | 0   | 0.590 | 0.0000 | 46 | 0.39... 0.72 |
| Nov-Oct | 0   | 0.605 | 0.0000 | 46 | 0.42... 0.74 |
| Dec-Nov | 0   | 0.624 | 0.0000 | 45 | 0.44... 0.76 |

Supplementary Table 18 - Rodrigues AT station with Rodrigues coral composite SST (trend) for annual averages 1951-2005.

| months  | lag | corr  | p      | no | 95% CI       |
|---------|-----|-------|--------|----|--------------|
| Jan-Dec | 0   | 0.715 | 0.0000 | 45 | 0.56... 0.83 |
| Feb-Jan | 0   | 0.693 | 0.0000 | 45 | 0.55... 0.81 |
| Mar-Feb | 0   | 0.672 | 0.0000 | 45 | 0.51... 0.80 |
| Apr-Mar | 0   | 0.649 | 0.0000 | 46 | 0.49... 0.78 |
| May-Apr | 0   | 0.659 | 0.0000 | 46 | 0.48... 0.79 |
| Jun-May | 0   | 0.679 | 0.0000 | 46 | 0.50... 0.81 |
| Jul-Jun | 0   | 0.663 | 0.0000 | 47 | 0.48... 0.80 |
| Aug-Jul | 0   | 0.668 | 0.0000 | 47 | 0.49... 0.82 |
| Sep-Aug | 0   | 0.638 | 0.0000 | 47 | 0.43... 0.80 |
| Oct-Sep | 0   | 0.664 | 0.0000 | 46 | 0.46... 0.81 |
| Nov-Oct | 0   | 0.669 | 0.0000 | 46 | 0.49... 0.80 |
| Dec-Nov | 0   | 0.701 | 0.0000 | 45 | 0.53... 0.82 |

Supplementary Table 19 - Rodrigues AT station with Cabri SST (trend) for annual averages 1951-2005.

| months  | lag | corr  | p      | no | 95% CI        |
|---------|-----|-------|--------|----|---------------|
| Jan-Dec | 0   | 0.146 | 0.3431 | 44 | -0.04... 0.36 |
| Feb-Jan | 0   | 0.179 | 0.2449 | 44 | -0.03... 0.36 |
| Mar-Feb | 0   | 0.206 | 0.1787 | 44 | 0.01... 0.41  |
| Apr-Mar | 0   | 0.291 | 0.0521 | 45 | 0.06... 0.52  |
| May-Apr | 0   | 0.317 | 0.0337 | 45 | 0.07... 0.56  |
| Jun-May | 0   | 0.306 | 0.0408 | 45 | 0.09... 0.53  |
| Jul-Jun | 0   | 0.306 | 0.0385 | 46 | 0.06... 0.53  |
| Aug-Jul | 0   | 0.293 | 0.0479 | 46 | 0.03... 0.51  |
| Sep-Aug | 0   | 0.148 | 0.3247 | 46 | -0.14... 0.47 |
| Oct-Sep | 0   | 0.107 | 0.4860 | 45 | -0.17... 0.37 |
| Nov-Oct | 0   | 0.130 | 0.3954 | 45 | -0.13... 0.40 |
| Dec-Nov | 0   | 0.099 | 0.5239 | 44 | -0.14... 0.33 |

Supplementary Table 20 - Rodrigues AT station with Totor SST (trend) for annual averages 1951-2005.

| months  | lag | corr  | p      | no | 95% CI       |
|---------|-----|-------|--------|----|--------------|
| Jan-Dec | 0   | 0.516 | 0.0001 | 54 | 0.35... 0.68 |
| Feb-Jan | 0   | 0.467 | 0.0004 | 54 | 0.28... 0.65 |
| Mar-Feb | 0   | 0.434 | 0.0009 | 55 | 0.27... 0.62 |
| Apr-Mar | 0   | 0.387 | 0.0035 | 55 | 0.25... 0.59 |
| May-Apr | 0   | 0.379 | 0.0043 | 55 | 0.25... 0.57 |
| Jun-May | 0   | 0.389 | 0.0033 | 55 | 0.27... 0.56 |
| Jul-Jun | 0   | 0.407 | 0.0021 | 55 | 0.25... 0.58 |
| Aug-Jul | 0   | 0.455 | 0.0005 | 55 | 0.26... 0.64 |
| Sep-Aug | 0   | 0.438 | 0.0008 | 55 | 0.22... 0.63 |
| Oct-Sep | 0   | 0.466 | 0.0004 | 54 | 0.25... 0.65 |
| Nov-Oct | 0   | 0.479 | 0.0002 | 54 | 0.27... 0.66 |
| Dec-Nov | 0   | 0.512 | 0.0001 | 54 | 0.33... 0.67 |

Supplementary Table 21 - Rodrigues HadNMAT2 with Rodrigues coral composite SST (detrend) for annual averages 1945-2006.

| months  | lag | corr  | p      | no | 95% CI       |
|---------|-----|-------|--------|----|--------------|
| Jan-Dec | 0   | 0.450 | 0.0006 | 54 | 0.23... 0.63 |
| Feb-Jan | 0   | 0.401 | 0.0026 | 54 | 0.19... 0.60 |
| Mar-Feb | 0   | 0.388 | 0.0034 | 55 | 0.17... 0.58 |
| Apr-Mar | 0   | 0.347 | 0.0094 | 55 | 0.15... 0.56 |
| May-Apr | 0   | 0.347 | 0.0095 | 55 | 0.14... 0.55 |
| Jun-May | 0   | 0.355 | 0.0079 | 55 | 0.15... 0.56 |
| Jul-Jun | 0   | 0.365 | 0.0062 | 55 | 0.14... 0.57 |
| Aug-Jul | 0   | 0.418 | 0.0015 | 55 | 0.20... 0.63 |
| Sep-Aug | 0   | 0.442 | 0.0007 | 55 | 0.23... 0.63 |
| Oct-Sep | 0   | 0.480 | 0.0002 | 54 | 0.28... 0.69 |
| Nov-Oct | 0   | 0.477 | 0.0003 | 54 | 0.27... 0.68 |
| Dec-Nov | 0   | 0.485 | 0.0002 | 54 | 0.28... 0.67 |

Supplementary Table 22 - Rodrigues HadNMAT2 with Cabri SST (detrend) for annual averages 1945-2006.

| months  | lag | corr  | p      | no | 95% CI        |
|---------|-----|-------|--------|----|---------------|
| Jan-Dec | 0   | 0.346 | 0.0111 | 53 | 0.11... 0.54  |
| Feb-Jan | 0   | 0.320 | 0.0197 | 53 | 0.07... 0.54  |
| Mar-Feb | 0   | 0.295 | 0.0306 | 54 | 0.05... 0.52  |
| Apr-Mar | 0   | 0.270 | 0.0481 | 54 | 0.03... 0.50  |
| May-Apr | 0   | 0.254 | 0.0638 | 54 | 0.03... 0.47  |
| Jun-May | 0   | 0.248 | 0.0703 | 54 | 0.00... 0.44  |
| Jul-Jun | 0   | 0.252 | 0.0661 | 54 | 0.00... 0.46  |
| Aug-Jul | 0   | 0.269 | 0.0489 | 54 | -0.02... 0.50 |
| Sep-Aug | 0   | 0.232 | 0.0916 | 54 | -0.03... 0.47 |
| Oct-Sep | 0   | 0.221 | 0.1119 | 53 | -0.04... 0.47 |
| Nov-Oct | 0   | 0.264 | 0.0561 | 53 | 0.01... 0.50  |
| Dec-Nov | 0   | 0.313 | 0.0223 | 53 | 0.08... 0.53  |

Supplementary Table 23 - Rodrigues HadNMAT2 with Totor SST (detrend) for annual averages 1945-2006.



| months  | lag | corr  | p      | no | 95% CI        |
|---------|-----|-------|--------|----|---------------|
| Jan-Dec | 0   | 0.304 | 0.0145 | 64 | 0.09... 0.51  |
| Feb-Jan | 0   | 0.268 | 0.0334 | 63 | 0.02... 0.48  |
| Mar-Feb | 0   | 0.281 | 0.0254 | 63 | 0.07... 0.50  |
| Apr-Mar | 0   | 0.262 | 0.0382 | 63 | 0.06... 0.46  |
| May-Apr | 0   | 0.250 | 0.0481 | 63 | 0.02... 0.44  |
| Jun-May | 0   | 0.234 | 0.0648 | 63 | 0.03... 0.43  |
| Jul-Jun | 0   | 0.222 | 0.0805 | 63 | 0.03... 0.40  |
| Aug-Jul | 0   | 0.191 | 0.1313 | 64 | -0.06... 0.40 |
| Sep-Aug | 0   | 0.167 | 0.1863 | 64 | -0.07... 0.37 |
| Oct-Sep | 0   | 0.157 | 0.2146 | 64 | -0.08... 0.38 |
| Nov-Oct | 0   | 0.196 | 0.1213 | 64 | -0.05... 0.45 |
| Dec-Nov | 0   | 0.245 | 0.0492 | 65 | 0.02... 0.46  |

Supplementary Table 24 - Rodrigues HadNMAT2 with Totor SST (detrend) for annual averages, all years with data.

| months  | lag | corr  | p      | no | 95% CI       |
|---------|-----|-------|--------|----|--------------|
| Jan-Dec | 0   | 0.298 | 0.0285 | 54 | 0.06... 0.54 |
| Feb-Jan | 0   | 0.263 | 0.0546 | 54 | 0.00... 0.50 |
| Mar-Feb | 0   | 0.272 | 0.0464 | 54 | 0.02... 0.49 |
| Apr-Mar | 0   | 0.311 | 0.0221 | 54 | 0.07... 0.53 |
| May-Apr | 0   | 0.348 | 0.0098 | 54 | 0.13... 0.55 |
| Jun-May | 0   | 0.371 | 0.0057 | 54 | 0.15... 0.57 |
| Jul-Jun | 0   | 0.400 | 0.0027 | 54 | 0.20... 0.62 |
| Aug-Jul | 0   | 0.432 | 0.0011 | 54 | 0.25... 0.65 |
| Sep-Aug | 0   | 0.425 | 0.0014 | 54 | 0.22... 0.65 |
| Oct-Sep | 0   | 0.410 | 0.0030 | 54 | 0.17... 0.64 |
| Nov-Oct | 0   | 0.427 | 0.0019 | 53 | 0.15... 0.65 |
| Dec-Nov | 0   | 0.379 | 0.0060 | 53 | 0.12... 0.62 |

Supplementary Table 25 - Cabri SST (detrend) correlation with the PDO index (Mantua et al., 1997) for annual averages 1950-2006.

| months  | lag | corr  | p      | no | 95% CI       |
|---------|-----|-------|--------|----|--------------|
| Jan-Dec | 0   | 0.265 | 0.0595 | 54 | 0.04... 0.49 |
| Feb-Jan | 0   | 0.263 | 0.0551 | 54 | 0.02... 0.47 |
| Mar-Feb | 0   | 0.276 | 0.0434 | 54 | 0.06... 0.46 |
| Apr-Mar | 0   | 0.307 | 0.0241 | 54 | 0.10... 0.49 |
| May-Apr | 0   | 0.338 | 0.0124 | 54 | 0.15... 0.50 |
| Jun-May | 0   | 0.355 | 0.0085 | 54 | 0.17... 0.52 |
| Jul-Jun | 0   | 0.361 | 0.0074 | 54 | 0.14... 0.57 |
| Aug-Jul | 0   | 0.361 | 0.0072 | 54 | 0.12... 0.57 |
| Sep-Aug | 0   | 0.327 | 0.0159 | 54 | 0.09... 0.54 |
| Oct-Sep | 0   | 0.311 | 0.0219 | 54 | 0.07... 0.53 |
| Nov-Oct | 0   | 0.304 | 0.0345 | 53 | 0.02... 0.53 |
| Dec-Nov | 0   | 0.301 | 0.0399 | 53 | 0.05... 0.51 |

Supplementary Table 26 – Rodrigues coral composite SST (detrend) correlation with the PDO index (Mantua et al., 1997) for annual averages 1950-2006.
